# Supplementary material for: BCG enables protection against malaria through adjuvanting an Adenovirus-vectored vaccine
Source: Research Square preprint supplement (doi:10.21203/rs.3.rs-7858925/v1), 2025-10-22
Supplement: Supplementary file 1 [file 9245827ac794e32cb5c0c46b.docx]

## Supplementary Material


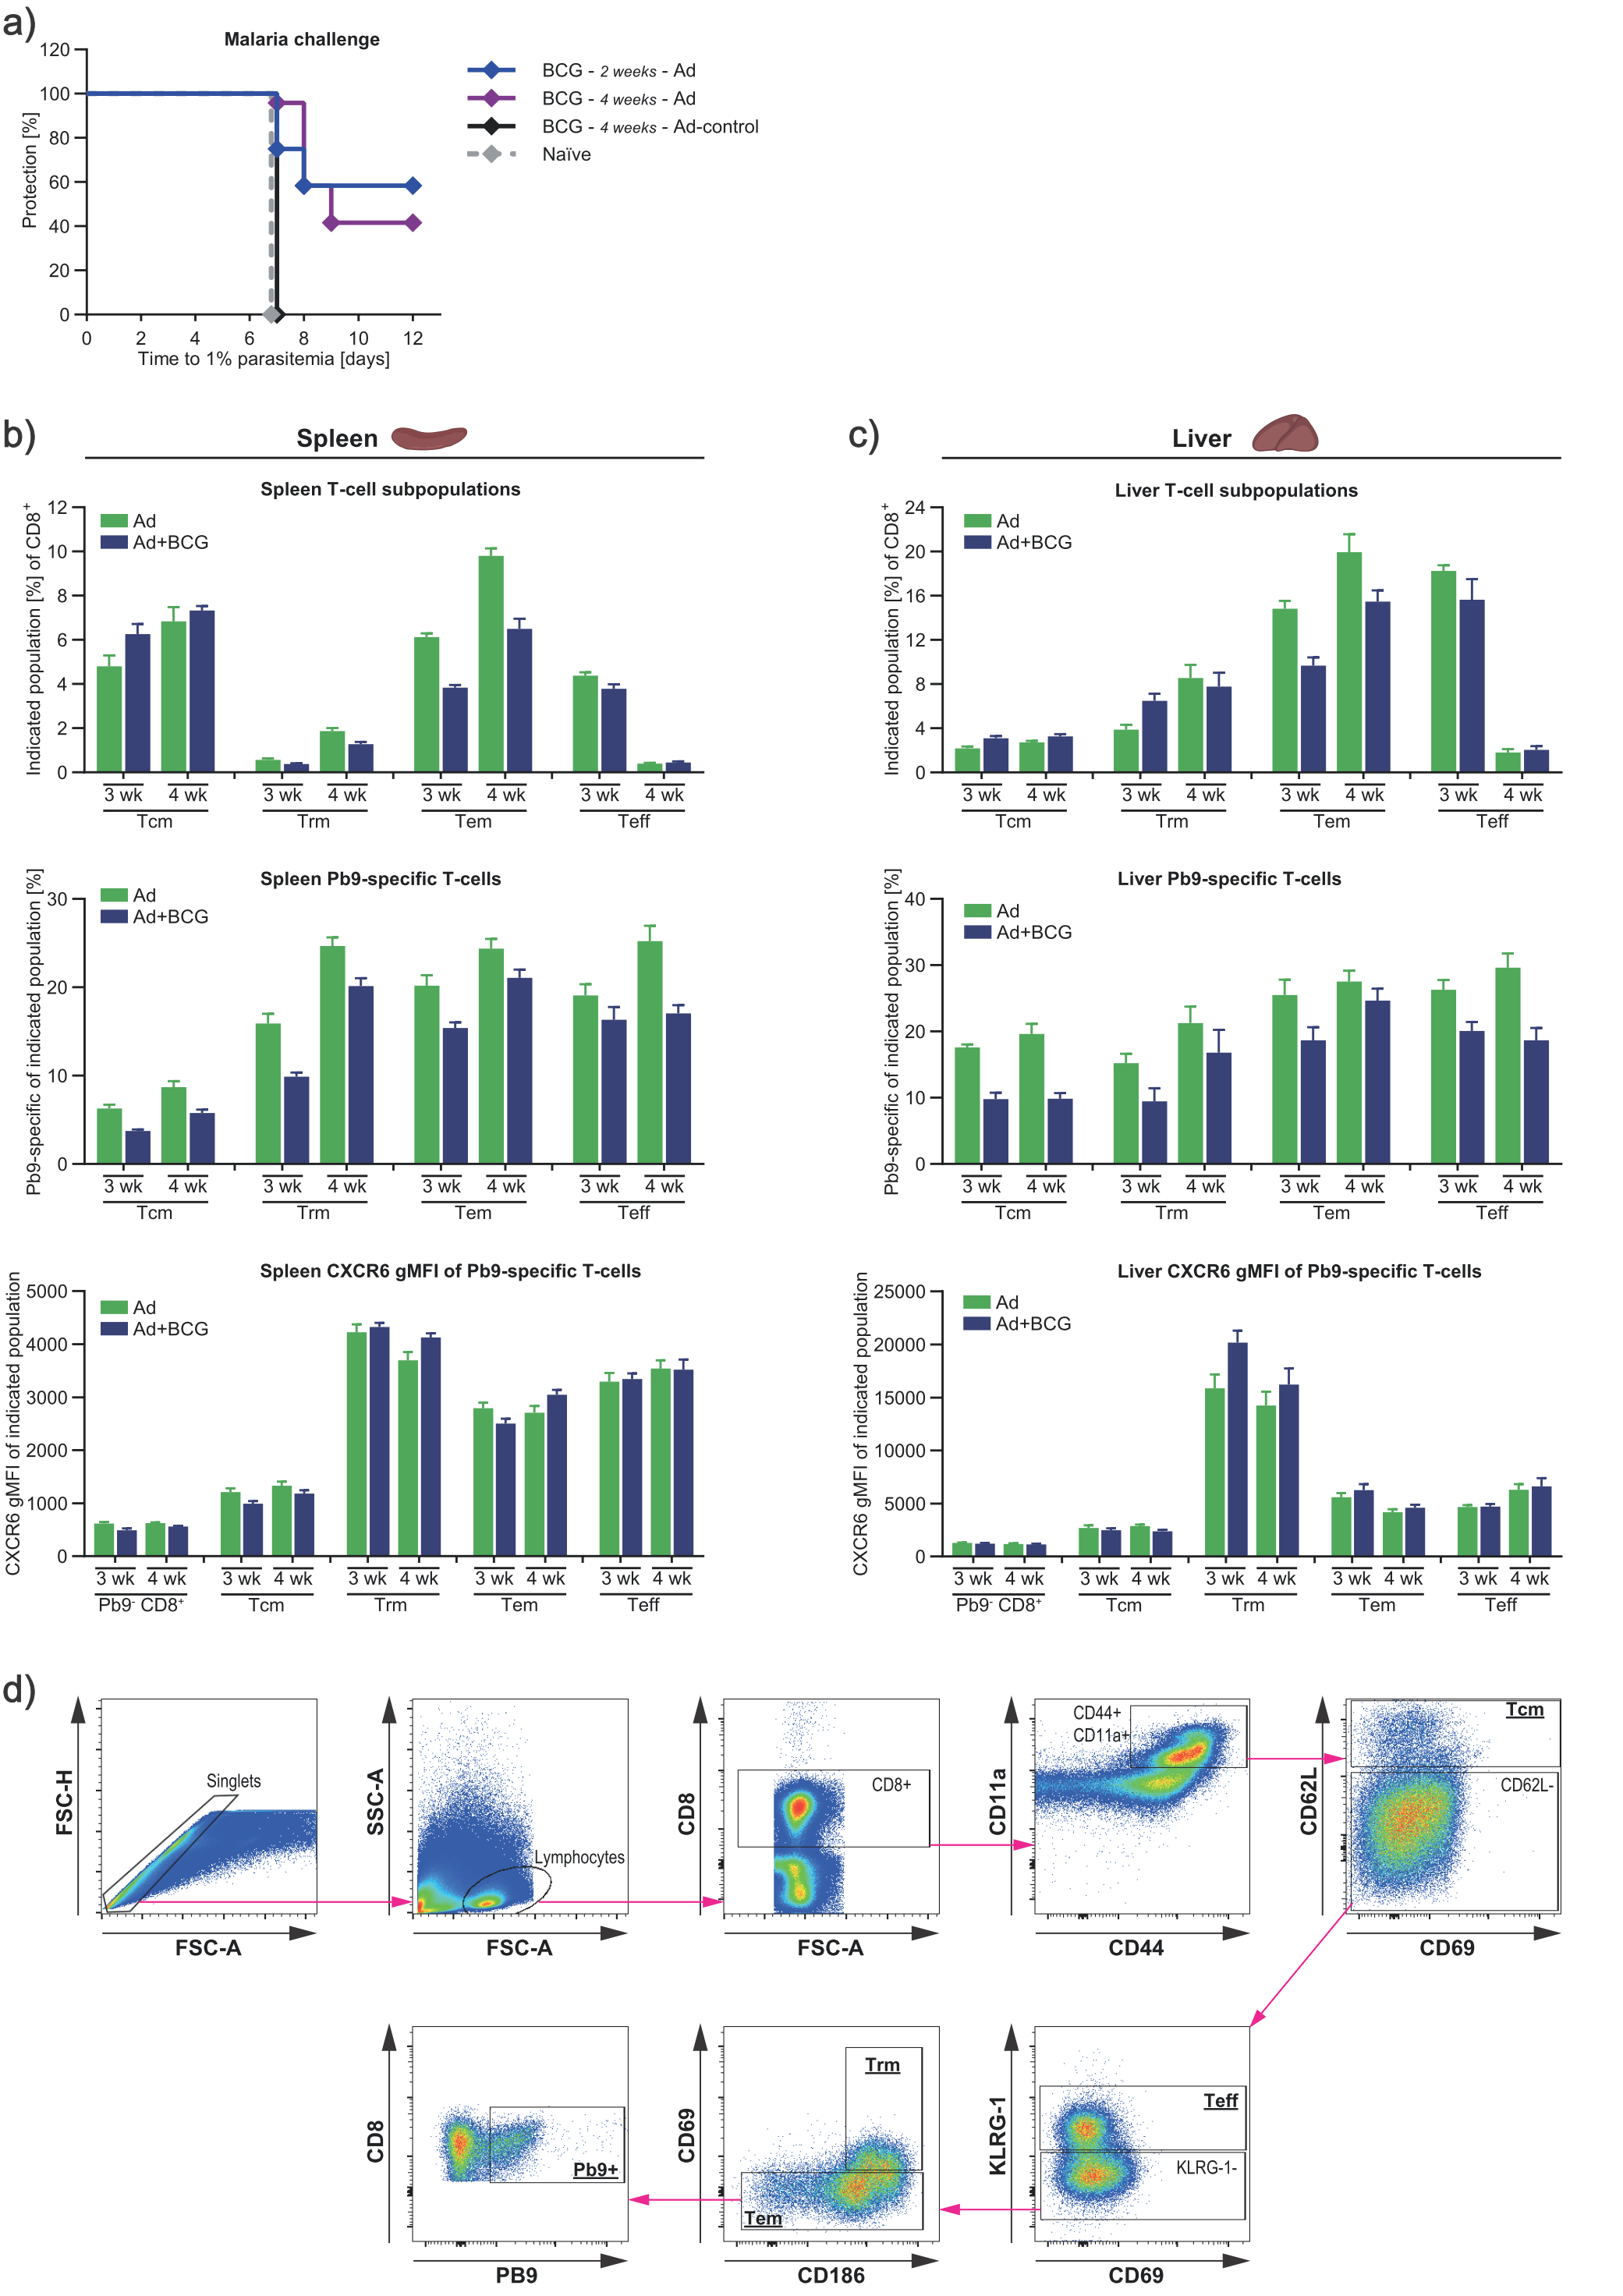


**Figure S1. Staggered immunisation with BCG and Ad enables partial protection against malaria in mice**.

**(a)** Survival post-malaria challenge: BALB/c mice were vaccinated with a BCG prime Ad boost regimen at indicated intervals and challenged with malaria 2 weeks post Ad immunisation. Parasitaemia was assessed by daily blood smears, with 1% parasitaemia taken as irreversible malaria infection (n ≥ 8).

**(b and c)** T cell phenotyping of splenic and hepatic cells by FACS after vaccination and harvest as described in 1a) (n = 6). Top panels show the distribution of T cell subpopulations within the CD8+ T cell compartment. Middle panels show relative numbers of Pb9-specific cells within T cell subpopulations. Bottom panels show the gMFI of the liver homing marker CXCR6 for Pb9-specific T cells and Pb9- CD8+ T cells.

**(d)** Gating strategy for T cell FACS data shown in figure 1 and S1.


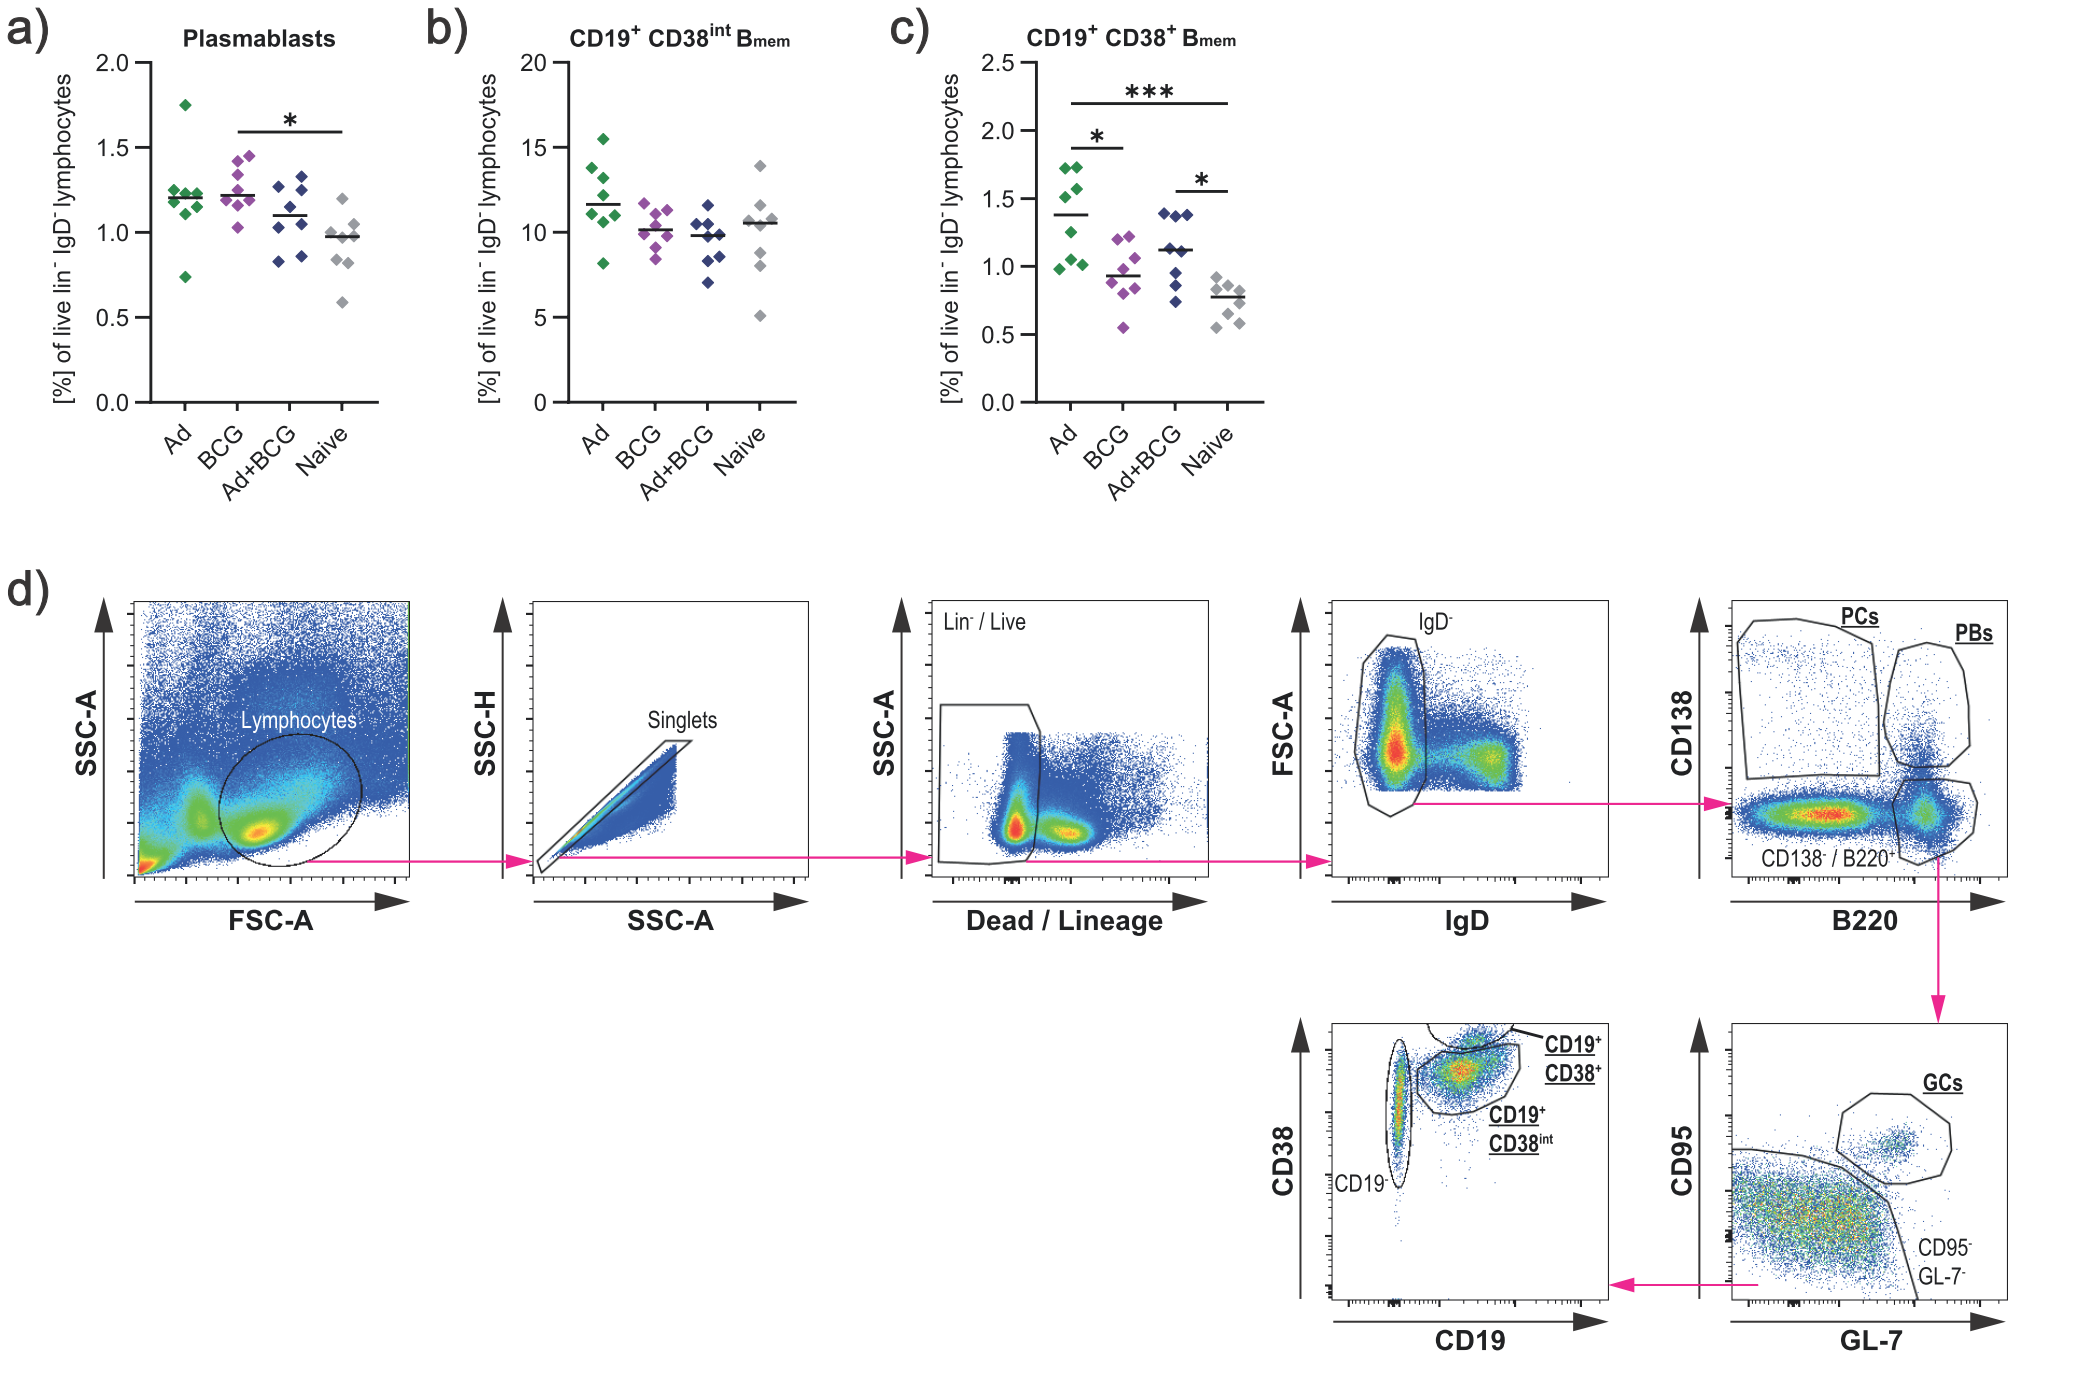


**Figure S2. Ad and BCG co-administration enhances the memory B cell compartment.**

**(a - c)** Total B cell phenotyping of splenic cells by FACS after vaccination and harvest as in Figure 1a). The specific cell populations are indicated. Gating strategy as in figure S2d. Median + replicates) (n = 8); One-way ANOVA with Bonferroni’s correction for multiple comparisons; *p < 0.05; **p < 0.01; ****p < 0.0001.

**(d)** Gating strategy for B cell FACS data shown in Figure 1 and S2.


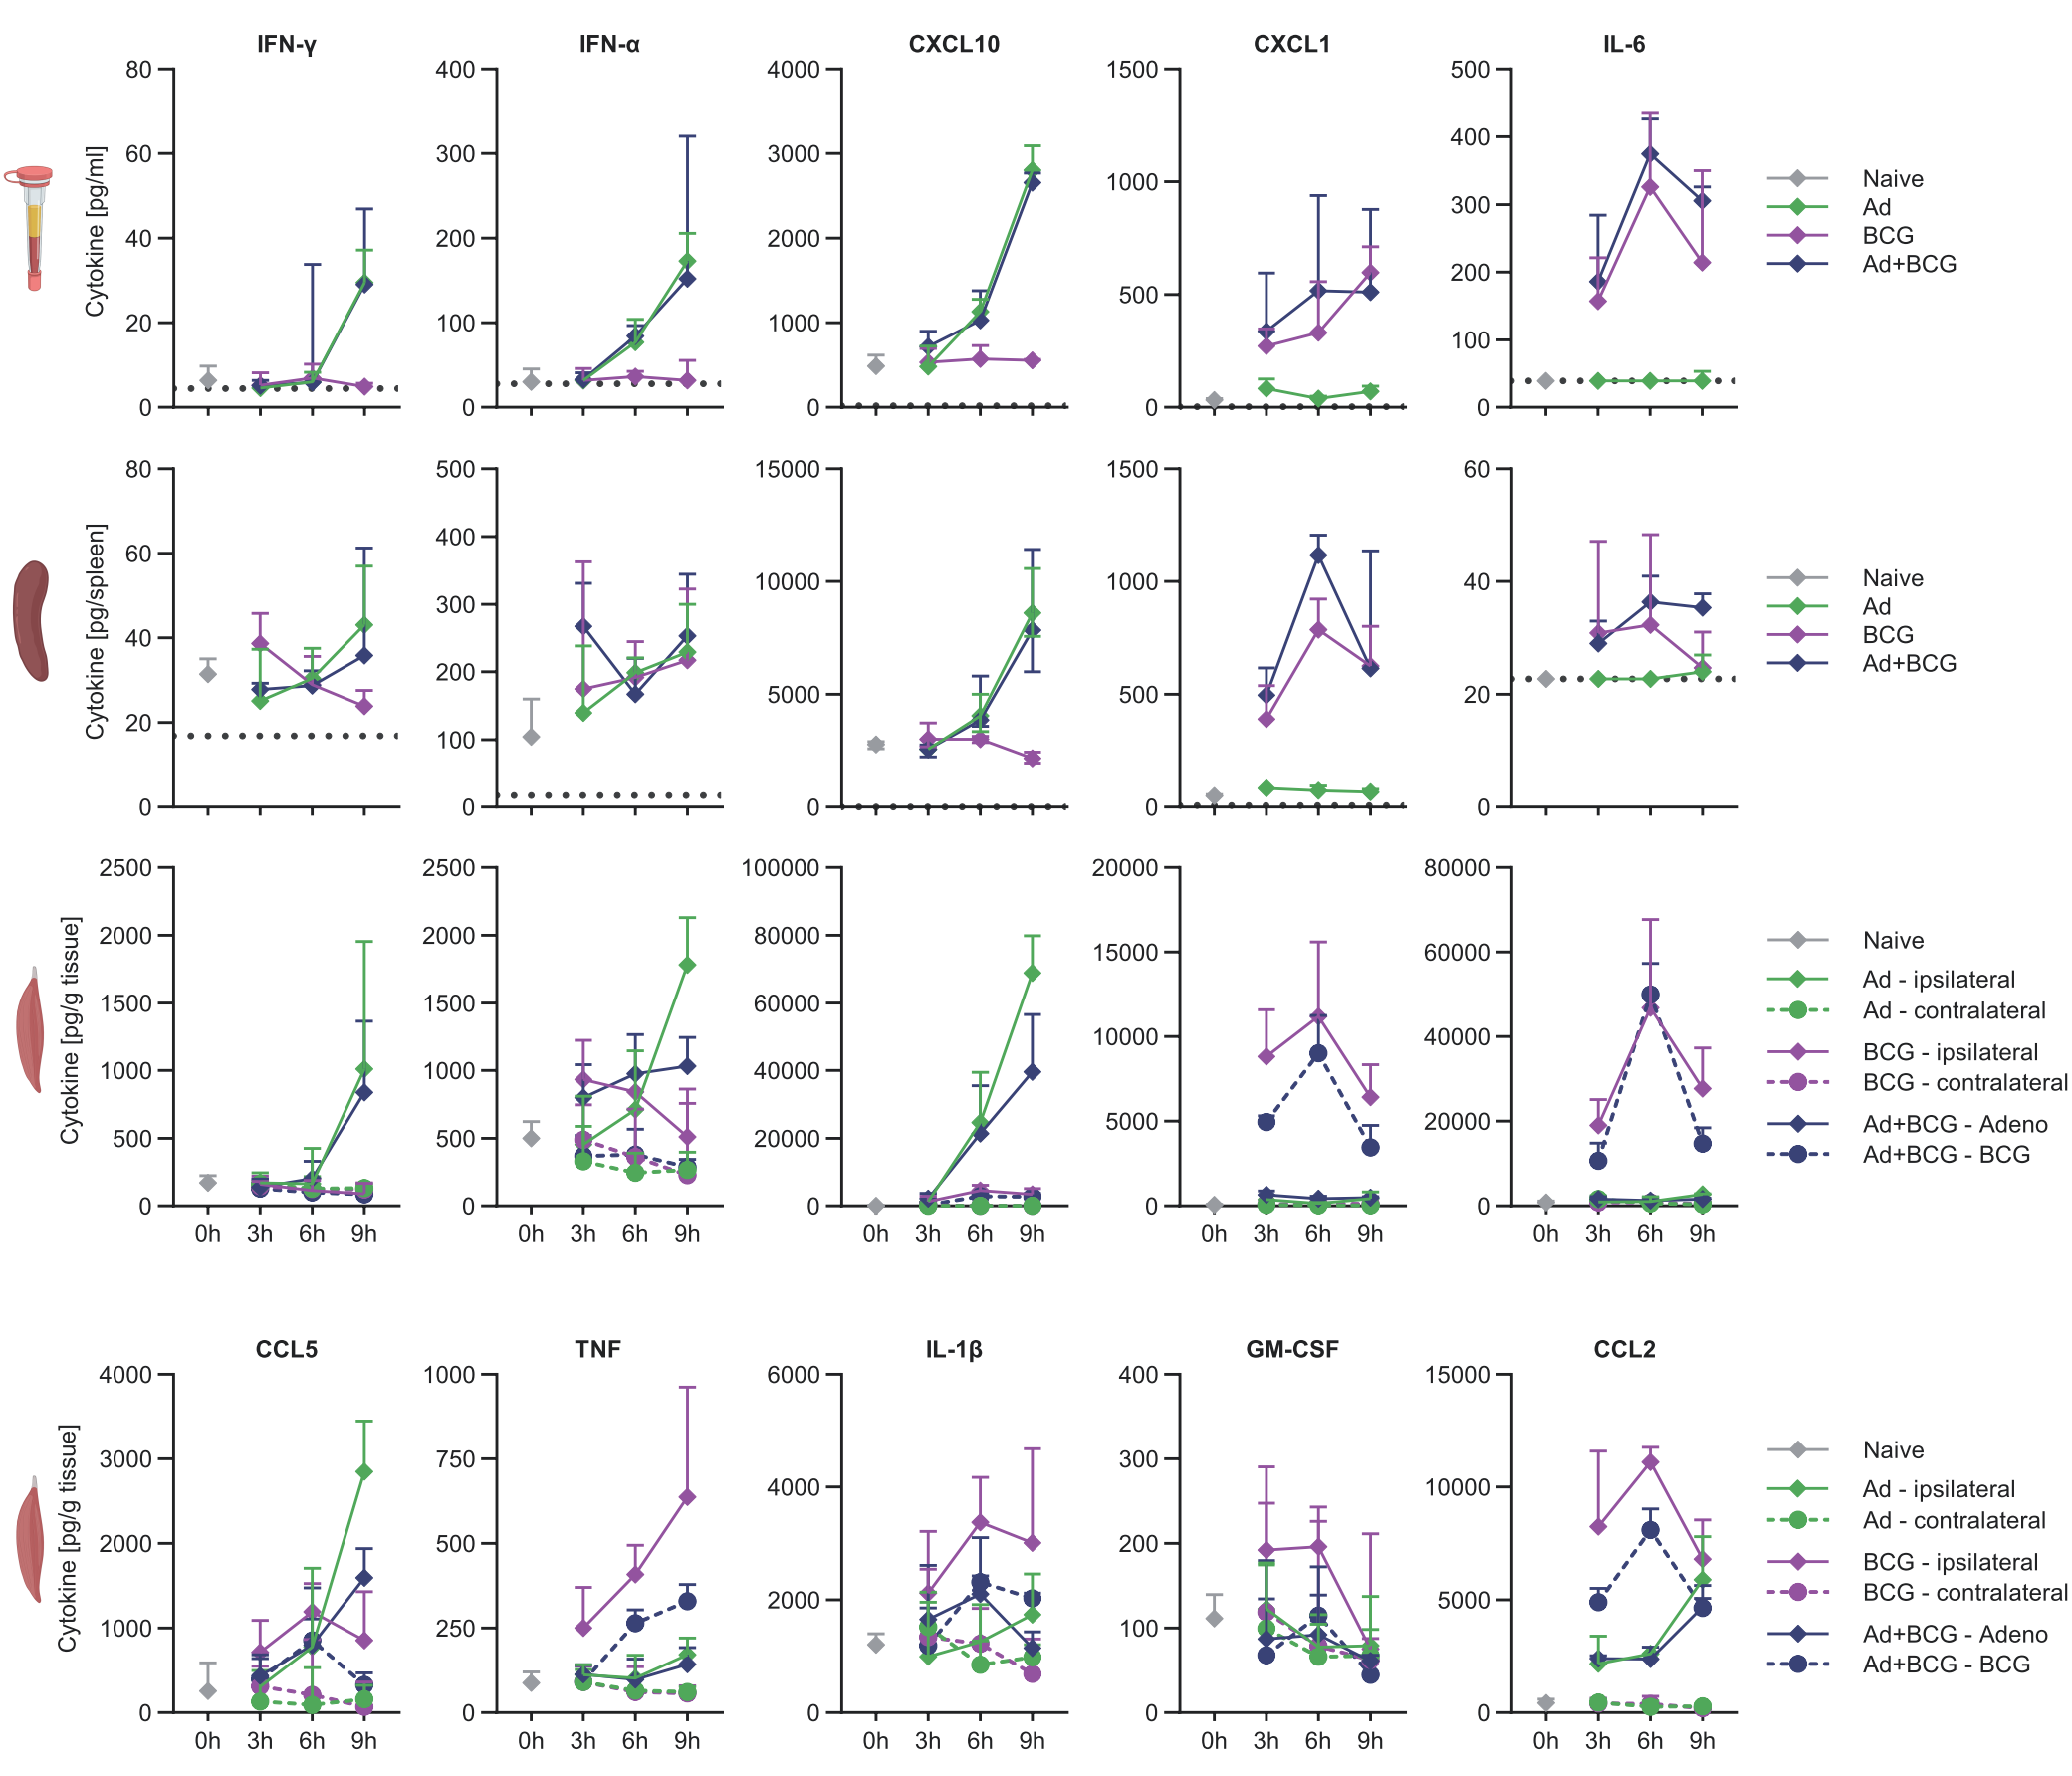


**Figure S3. Innate cytokine kinetics post Ad and BCG immunisation**

Detailed representation of data shown in Figure 2b – d.Vaccine dose per mouse: 0.5x105 CFU for BCG and 5x107 i.u. for AdHu5-TIPeGFP ) (n = 6). In the Ad+BCG group, Ad was injected into the right leg and BCG into the left leg. Indicated cytokines were measured using LEGENDplexTM MU Anti-Virus Response Panel. Graphs show the cytokine levels detected in the serum, spleen, and the site of immunisation (SOI) in the ipsi- and contra-lateral muscles for each vaccine (Ad alone and BCG alone: contralateral leg received no vaccine, Ad+BCG: each leg received one of the vaccines).
